# Supplementary material for: Mechanisms of scent-tracking in humans
Source: Springer Nature journal article supplement (doi:10.1038/nn1819), 2006-12-17
Supplement: nn1819-S1.pdf [file nn1819-S1.pdf]

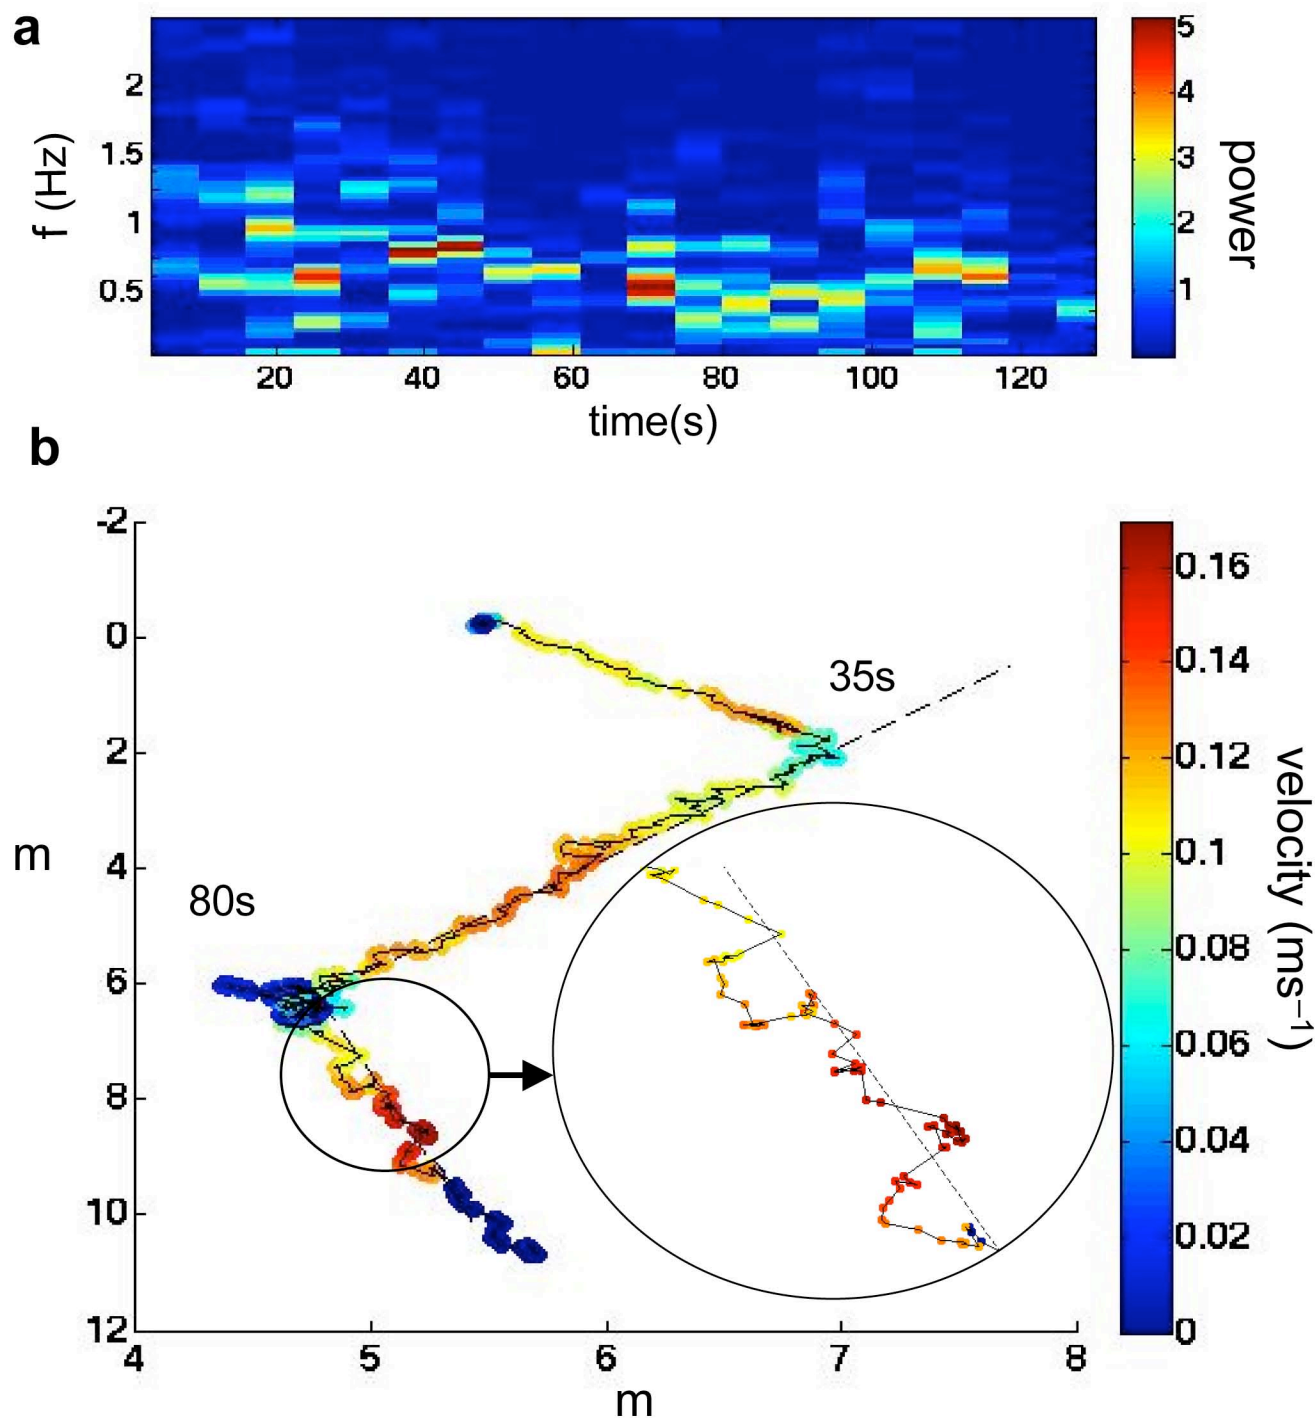

**Supp Fig. 1 An example dynamic power spectra and tracking path. (a)** Dynamic power spectrum shows the power spectra as a function of time. Power spectra were calculated via a short time Fourier transform with a time window of 12.8s and an overlap of 6.4s. **(b)** A subject tracking path, shown in solid black line, with colored markers overlaid representing the instantaneous velocity at each point ( $\text{ms}^{-1}$ ). The subject encounters the scent trail at 35 seconds and encounters the sharp turn at 80 seconds. Inset is an enlarged view of a section of the path. The dashed line represents the underlying scent trail.
